# Supplementary material for: Polarization lidar for detecting dust orientation: System design andcalibration
Source: Copernicus journal article supplement (doi:10.5194/amt-2021-30), 2021-02-15
Supplement: Supplementary file 1 [file amt-2021-30-supplement.pdf]

Supplement of “Polarization lidar for detecting dust  
orientation: System design and calibration”  
(Tsekeri et al.)

February 11, 2021

# S1 Mueller matrices of the atmosphere and of the optical elements of the lidar

## S1.1 Backscatter Stokes phase matrices of the atmosphere

### S1.1.1 Oriented dust particles

The backscatter Stokes phase matrix of oriented dust particles is shown in Eq. S1

$$\mathbf{F} = \begin{bmatrix} F_{11} & F_{12} & F_{13} & F_{14} \\ F_{12} & F_{22} & F_{23} & F_{24} \\ -F_{13} & -F_{23} & F_{33} & F_{34} \\ F_{14} & F_{24} & -F_{34} & F_{44} \end{bmatrix} = F_{11} \begin{bmatrix} 1 & f_{12} & f_{13} & f_{14} \\ f_{12} & f_{22} & f_{23} & f_{24} \\ -f_{13} & -f_{23} & f_{33} & f_{34} \\ f_{14} & f_{24} & -f_{34} & f_{44} \end{bmatrix} \quad (\text{S1})$$

Where,  $f_{ij} = \frac{F_{ij}}{F_{11}}$ .

### S1.1.2 Atmospheric gases

The backscatter Stokes phase matrix of the gases in the atmosphere is shown in Eq. S2

$$\mathbf{G} = \begin{bmatrix} G_{11} & 0 & 0 & 0 \\ 0 & G_{22} & 0 & 0 \\ 0 & 0 & G_{33} & 0 \\ 0 & 0 & 0 & G_{44} \end{bmatrix} = G_{11} \begin{bmatrix} g_{11} & 0 & 0 & 0 \\ 0 & g_{22} & 0 & 0 \\ 0 & 0 & g_{33} & 0 \\ 0 & 0 & 0 & g_{44} \end{bmatrix} \quad (\text{S2})$$

Where,  $g_{ii} = \frac{G_{ii}}{F_{11}}$ .

### S1.1.3 Randomly-oriented particles and atmospheric gases

The backscatter stokes phase matrix of an atmosphere with randomly-oriented particles and gases is  $\mathbf{F}_{atm}(a)$ , where “*atm*” denotes the atmosphere (aerosols and gases) and  $a$  is the polarization parameter of the atmosphere,  $a = \frac{F_{22}+G_{22}}{F_{11}+G_{11}} = -\frac{F_{33}+G_{33}}{F_{11}+G_{11}}$ .

$$\mathbf{F}_{atm}(a) = (F_{11} + G_{11}) \begin{bmatrix} 1 & 0 & 0 & 0 \\ 0 & a & 0 & 0 \\ 0 & 0 & -a & 0 \\ 0 & 0 & 0 & 1 - 2a \end{bmatrix} \quad (\text{S3})$$

## S1.2 Mueller matrices of the optical elements of the lidar

The Mueller matrices of the optical elements of the lidar are shown in Eq. S4 - S11. The values of the optical element specs are provided by the corresponding manufacturers.

### S1.2.1 Receiver optics

(Eq. S.4.12 in Freudenthaler (2016))

$$\mathbf{M}_O = T_O \begin{bmatrix} 1 & D_O & 0 & 0 \\ D_O & 1 & 0 & 0 \\ 0 & 0 & Z_O c_O & Z_O s_O \\ 0 & 0 & -Z_O s_O & Z_O c_O \end{bmatrix} \quad (\text{S4})$$

$T_O$  is the transmission

$D_O$  is the diattenuation parameter

$$Z_O = \sqrt{1 - D_O^2}$$

$c_O = \cos(\Delta_{T_O})$ ,  $s_O = \sin(\Delta_{T_O})$  ( $\Delta_{T_O}$  is the retardance)

The values provided by the manufacturers are  $D_O = 0$ ,  $Z_O = 1$  and  $\Delta_{T_O} = 0$

$$\mathbf{M}_O = T_O \begin{bmatrix} 1 & 0 & 0 & 0 \\ 0 & 1 & 0 & 0 \\ 0 & 0 & 1 & 0 \\ 0 & 0 & 0 & 1 \end{bmatrix} \quad (\text{S5})$$

### S1.2.2 Half Wave Plate (*HWP*)

$$\mathbf{M}_{\text{HW}}(\theta) = \begin{bmatrix} 1 & 0 & 0 & 0 \\ 0 & c_{4\theta} & s_{4\theta} & 0 \\ 0 & s_{4\theta} & -c_{4\theta} & 0 \\ 0 & 0 & 0 & -1 \end{bmatrix} \quad (\text{S6})$$

$\theta$  is the fast-axis-angle relative to the reference plane

$$c_{4\theta} = \cos(4\theta), \quad s_{4\theta} = \sin(4\theta)$$

### S1.2.3 Quarter Wave Plate (*QWP*)

$$\mathbf{M}_{\text{QW}}(\phi) = \begin{bmatrix} 1 & 0 & 0 & 0 \\ 0 & c_{2\phi}^2 & s_{2\phi}c_{2\phi} & -s_{2\phi} \\ 0 & s_{2\phi}c_{2\phi} & s_{2\phi}^2 & c_{2\phi} \\ 0 & s_{2\phi} & -c_{2\phi} & 0 \end{bmatrix} \quad (\text{S7})$$

$\phi$  is the fast-axis-angle relative to the reference plane

$$c_{2\phi} = \cos(2\phi), \quad s_{2\phi} = \sin(2\phi)$$

### S1.2.4 Polarizing Beam Splitter (*PBS*)

#### 1.2.4.1 Transmitting part

$$\mathbf{M}_T = T_T \begin{bmatrix} 1 & D_T & 0 & 0 \\ D_T & 1 & 0 & 0 \\ 0 & 0 & Z_T & 0 \\ 0 & 0 & 0 & Z_T \end{bmatrix} \quad (\text{S8})$$

$$T_T = \frac{T_T^p + T_T^s}{2}$$

$$D_T = \frac{T_T^p - T_T^s}{T_T^p + T_T^s}$$

$$Z_T = \sqrt{1 - D_T^2}$$

$$\Delta_T = 0$$

With the use of cleaning polarizing sheet filters after the *PBS*, considering “ideal cleaning” we get  $D_T = 1$  and  $Z_T = 0$  (S.10.10 in Freudenthaler (2016)):

$$\mathbf{M}_T = T_T \begin{bmatrix} 1 & 1 & 0 & 0 \\ 1 & 1 & 0 & 0 \\ 0 & 0 & 0 & 0 \\ 0 & 0 & 0 & 0 \end{bmatrix} \quad (\text{S9})$$

#### 1.2.4.2 Reflecting part

$$\mathbf{M}_R = T_R \begin{bmatrix} 1 & D_R & 0 & 0 \\ D_R & 1 & 0 & 0 \\ 0 & 0 & -Z_R & 0 \\ 0 & 0 & 0 & -Z_R \end{bmatrix} \quad (\text{S10})$$

$$T_R = \frac{T_R^p + T_R^s}{2}$$

$$D_R = \frac{T_R^p - T_R^s}{T_R^p + T_R^s}$$

$$Z_R = \sqrt{1 - D_R^2}$$

$$\Delta_R = 0$$

With the use of cleaning polarizing sheet filters after the *PBS*, considering “ideal cleaning” we get  $D_R = -1$  and  $Z_R = 0$  (S.10.10 in Freudenthaler (2016)):

$$\mathbf{M}_{\mathbf{R}} = T_R \begin{bmatrix} 1 & -1 & 0 & 0 \\ -1 & 1 & 0 & 0 \\ 0 & 0 & 0 & 0 \\ 0 & 0 & 0 & 0 \end{bmatrix} \quad (\text{S11})$$

## S2 Calculation of the measured signals $I_{\text{Li-Tk-S}}$

The measured signals  $I_{i.k.S}$  for laser  $i = LA, LB$ , at the detection unit after telescope  $k = TA, TB$ , at the detector  $S = T, R$  (“Transmitted” and “Reflected” channel after the  $PBS_k$ , respectively), are shown in Eq. S12 and S13. In Eq. S12 and S13 we consider background-corrected values and we omit the electronic noise at the detectors.

$$I_{i.TA.S} = E_{i.TA} \eta_{S.TA} \tilde{\mathbf{e}} \mathbf{M}_{S.TA} \mathbf{M}_{O.TA} (\mathbf{F} + \mathbf{G}) \tilde{\mathbf{i}}_i \quad (\text{S12})$$

$$I_{i.TB.S} = E_{i.TB} \eta_{S.TB} \tilde{\mathbf{e}} \mathbf{M}_{S.TB} \mathbf{M}_{QW.TB} \mathbf{M}_{O.TB} (\mathbf{F} + \mathbf{G}) \tilde{\mathbf{i}}_i \quad (\text{S13})$$

In Eq. S12 and S13,  $E_{i.k} = A_k O_{i.k} T(0, r)^{-2} E_{oi}$ , where  $A_k$  is the area of the telescope  $k$ ,  $O_{i.k}$  is the overlap function of the laser beam receiver field-of-view with range 0-1 (for laser  $i$  and telescope  $k$ ),  $T(0, r)$  is the transmission of the atmosphere between the lidar at range  $r = 0$  and a specific range in the atmosphere, and  $E_{oi}$  is the pulse energy of laser  $i$ .  $\eta_{S.k}$  is the amplification of the signals at  $S = T$  or  $R$  detector of the detection unit after telescope  $k$ .  $\tilde{\mathbf{e}} = [1, 0, 0, 0]^T$  is used to select the first component of the Stokes vector (the signal measured at the APDs).  $\mathbf{M}_{S.k}$  is the Mueller matrix of the  $PBS_k$  followed by cleaning polarizing sheet filters (Eq. S9 and S11),  $\mathbf{M}_{O.k}$  is the Mueller matrix of the receiver optics (i.e. telescope  $k$ , collimating lenses, bandpass filter; Eq. S5), and  $\mathbf{M}_{QW.TB}$  is the Mueller matrix of the  $QWP_{TB}$  (Eq. S7).  $\mathbf{F}$  (Eq. S1) and  $\mathbf{G}$  (Eq. S2) are the backscatter Stokes phase matrices of the dust particles and of the gas molecules, respectively, at a certain range in the atmosphere.  $\tilde{\mathbf{i}}_i$  is the Stokes vector of the light from the emission unit of laser  $i$ .

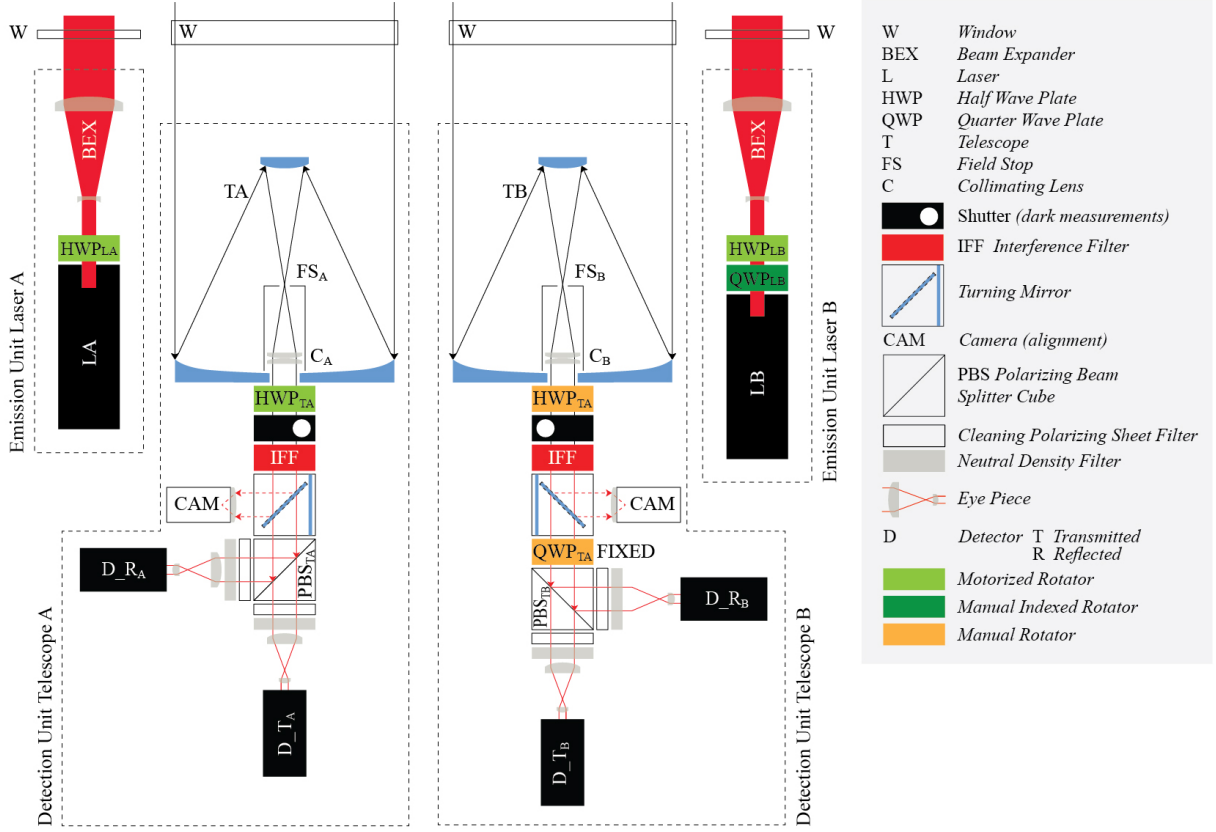

Figure S1: Sketch of the system design: two lasers shooting alternatively ( $L_A$  and  $L_B$ ), with the backscattered signals correspondingly alternatively collected by two telescopes ( $T_A$  and  $T_B$ ) and then redirected at two detectors for each telescope ( $D_{-S_j}$ ,  $S = T, R$  as of "Transmitted" and "Reflected" channels,  $j = A, B$ ). The polarization of the light emitted from each laser is changed appropriately, using the  $HWP_{LA}$  for laser A and the  $QWP_{LB}$  followed by the  $HWP_{LB}$  for laser B. The laser beam of each laser is expanded with a beam expander (BEX). After the first telescope the light goes through  $PBS_{TA}$  and after the second telescope the light goes through  $QWP_{TB}$  and  $PBS_{TB}$ . The  $HWP_{TA}$  at telescope A is used to correct the rotation of the  $PBS_{TA}$  (Section 4.1 in the manuscript). The  $HWP_{TB}$  at telescope B is used to check the position of the  $QWP_{TB}$  with respect to the  $PBS_{TB}$  (Section S4)). The shutter at each telescope is used for performing dark measurements. The camera at each telescope is used for the alignment of the laser beams with the field-of-view of the telescope.

## S2.1 The polarization of the light from the emission units of lasers A and B

The Stokes vector of the light from the emission units of laser A and B is defined with respect to the "frame coordinate system", shown in Fig. S2a, and is provided by  $\tilde{\mathbf{i}}_{LA}$  (Eq. S14) and  $\tilde{\mathbf{i}}_{LB}$  (Eq. S15), respectively. The light emitted directly from the lasers ( $\tilde{\mathbf{i}}_{lsr_{LA}}$  and  $\tilde{\mathbf{i}}_{lsr_{LB}}$ ) is considered to be 100% linearly-polarized, with angle of polarization ellipse with respect to the frame coordinate system  $\alpha_{LA}$  and  $\alpha_{LB}$  for lasers A and B, respectively (Eq. S14 and S15). The polarization of the light from the whole emission units is then defined according to the position of the optical elements in front of the lasers, i.e. the  $HWP_{LA}$  in front of laser A, and the  $QWP_{LB}$  followed by the  $HWP_{LB}$  in front of laser B (Fig. S1, Fig. S2d and e; Eq. S14 and

S15).

$$\tilde{\mathbf{i}}_{LA} = \mathbf{M}_{HW\_LA}(\theta_{LA})\tilde{\mathbf{i}}_{lsr\_LA}(\alpha_{LA}) = \begin{bmatrix} 1 \\ c(4\theta_{LA}-2\alpha_{LA}) \\ s(4\theta_{LA}-2\alpha_{LA}) \\ 0 \end{bmatrix} = \begin{bmatrix} 1 \\ c_{4\vartheta_{LA}} \\ s_{4\vartheta_{LA}} \\ 0 \end{bmatrix} = \begin{bmatrix} 1 \\ 0 \\ 1 \\ 0 \end{bmatrix} \quad (\text{S14})$$

$$\begin{aligned} \tilde{\mathbf{i}}_{LB} &= \mathbf{M}_{HW\_LB}(\theta_{LB})\mathbf{M}_{QW\_LB}(\phi_{LB})\tilde{\mathbf{i}}_{lsr\_LB}(\alpha_{LB}) = \begin{bmatrix} 1 \\ c_{2(\phi_{LB}-\alpha_{LB})}c(4\theta_{LB}-2\phi_{LB}) \\ c_{2(\phi_{LB}-\alpha_{LB})}s(4\theta_{LB}-2\phi_{LB}) \\ -s_{2(\phi_{LB}-\alpha_{LB})} \end{bmatrix} = \\ &= \begin{bmatrix} 1 \\ c_{2\varphi_{LB}}c(4\theta_{LB}-2\phi_{LB}) \\ c_{2\varphi_{LB}}s(4\theta_{LB}-2\phi_{LB}) \\ -s_{2\varphi_{LB}} \end{bmatrix} = \begin{bmatrix} 1 \\ 0.85 \\ 0.17 \\ 0.5 \end{bmatrix} \end{aligned} \quad (\text{S15})$$

We use the angles  $\vartheta_{LA}$  (Eq. S16) and  $\varphi_{LB}$  (Eq. S17) to simplify Eq. S14 and S15, as shown in Eq. S18 and S19.

$$\vartheta_{LA} = \theta_{LA} - \frac{\alpha_{LA}}{2} \quad (\text{S16})$$

$$\varphi_{LB} = \phi_{LB} - \alpha_{LB} \quad (\text{S17})$$

$$\tilde{\mathbf{i}}_{LA} = \begin{bmatrix} 1 \\ c_{4\vartheta_{LA}} \\ s_{4\vartheta_{LA}} \\ 0 \end{bmatrix} \quad (\text{S18})$$

$$\tilde{\mathbf{i}}_{LB} = \begin{bmatrix} 1 \\ c_{2\varphi_{LB}}c(4\theta_{LB}-2\phi_{LB}) \\ c_{2\varphi_{LB}}s(4\theta_{LB}-2\phi_{LB}) \\ -s_{2\varphi_{LB}} \end{bmatrix} \quad (\text{S19})$$

The “ $DU_{TA}$  coordinate system” and the “ $DU_{TB}$  coordinate system” in Fig. S2b and c are the right-handed coordinate systems of the detection units after telescopes A and B, respectively. The  $x_{DU_{TA}}$  and  $y_{DU_{TA}}$  axis coincide with the incidence plane of  $PBS_{TA}$ , and the  $x_{DU_{TB}}$  and  $y_{DU_{TB}}$  axis coincide with the incidence plane of  $PBS_{TB}$ . The optical elements are considered to be perfectly aligned with each other in the detection units (because their holders are manufactured and assembled in a mechanical workshop with high accuracy), but the detection units are possibly rotated around the optical axis with respect to the frame coordinate system by angles  $\omega_{TA}$  and  $\omega_{TB}$ , respectively (Fig. S2b and c). The Stokes vectors of the light collected at telescope A and B are consequently described including a multiplication with the rotation matrices  $\mathbf{R}_{TA}(-\omega_{TA})$  and  $\mathbf{R}_{TB}(-\omega_{TB})$ , respectively (see Eq. S.5.1.7 in Freudenthaler 2016).

This rotation affects the measurements of the polarized components after  $PBS_{TA}$ , but not after  $PBS_{TB}$ . The rotation of the detection unit after telescope A is corrected using the  $HWP_{TA}$ , as shown in Section 4.1 in the manuscript.

Sections S2.2, S2.3, S2.4 and S2.5 provide the analytical calculations for the formulas of  $I_{Li.Tk.S}$ , taking into account all the optical elements of the system, including their misalignments.

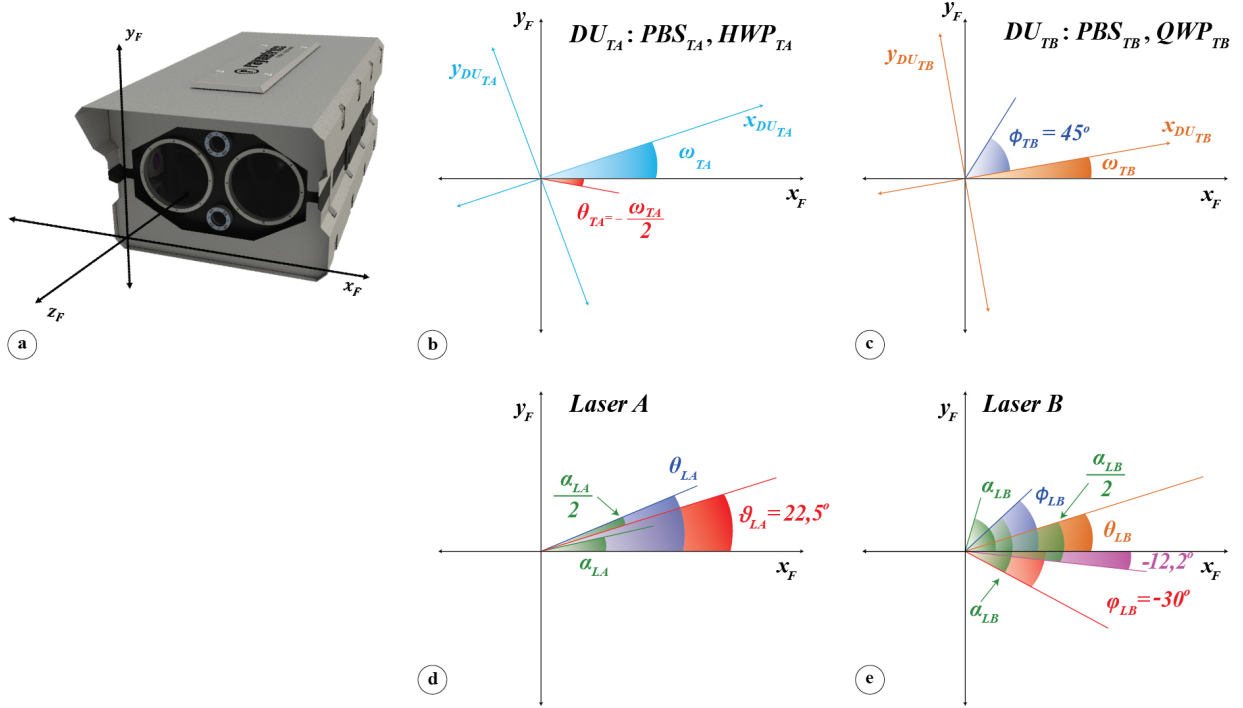

Figure S2: a) The “frame coordinate system” (black) is the reference coordinate system with  $x_F$ -axis parallel to the horizon. b) The “ $DU_{TA}$  coordinate system” (light blue) is the coordinate system of the detection unit after telescope A, which is rotated with respect to the frame coordinate system by an angle  $\omega_{TA}$ . The effect of this rotation on the signals is corrected using  $HWP_{TA}$ , placed at  $\theta_{TA} = -\frac{\omega_{TA}}{2}$  (red) with respect to the  $x_F$ -axis. c) The “ $DU_{TB}$  coordinate system” (orange) is the coordinate system of the detection unit after telescope B, which is rotated with respect to the frame coordinate system by an angle  $\omega_{TB}$ . The rotation does not affect the measured signals. The  $QWP_{TB}$  before  $PBS_{TB}$ , is placed at  $\phi_{TB} = 45^\circ$  with respect to the  $x_{DU_{TB}}$ -axis. d) The light emitted directly from laser A is linearly-polarized with unknown angle of polarization  $\alpha_{LA}$ . As shown in Eq. S14, using the  $HWP_{LA}$  with fast-axis-angle  $\theta_{LA} = 22.5^\circ + \frac{\alpha_{LA}}{2}$ , we produce the light emitted from the emission unit of laser A with angle of polarization  $2\vartheta_{LA} = 45^\circ$ . e) The light emitted directly from laser B is linearly-polarized with unknown angle of polarization  $\alpha_{LB}$ . As shown in Eq. S15, using the  $QWP_{LB}$  with fast-axis-angle  $\phi_{LB} = \alpha_{LB} - 30^\circ$ , and the  $HWP_{LB}$  with fast-axis-angle  $\theta_{LB} = \frac{\alpha_{LB}}{2} - 12.2^\circ$ , we produce the elliptically-polarized light emitted from the emission unit of laser B with angle of polarization  $5.6^\circ$  and degree of linear polarization 0.866.

## S2.2 $I_{LA\_TA\_S}$ : The signals from laser A, at the detection unit after telescope A

The measurements of the backscattered light of laser A at the detectors of telescope A are provided in Eq. S20. The rotation of the detection unit after telescope A by an angle  $\omega_{TA}$  (Fig. S2) is taken into account using the rotation matrix  $\mathbf{R}_{TA}(-\omega_{TA})$ . The  $HWP_{TA}$  (Fig. S1), with Mueller matrix  $\mathbf{M}_{HW\_TA}$  is used for the correction of the effect of this rotation on  $I_{LA\_TA\_S}$  (Section 4.1 in manuscript).

$$\begin{aligned}
\frac{I_{LA\_TA\_S}}{E_{LA\_TA}\eta_{S\_TA}} &= \tilde{\mathbf{e}}\mathbf{M}_{S\_TA}\mathbf{M}_{HW\_TA}\mathbf{M}_{O\_TA}\mathbf{R}_{TA}[\mathbf{F}(\tilde{\mathbf{x}}) + \mathbf{G}]\tilde{\mathbf{i}}_{LA} = \\
&= \begin{bmatrix} 1 \\ 0 \\ 0 \\ 0 \end{bmatrix} T_{S\_TA} \begin{bmatrix} 1 & D_{S\_TA} & 0 & 0 \\ D_{S\_TA} & 1 & 0 & 0 \\ 0 & 0 & 0 & 0 \\ 0 & 0 & 0 & 0 \end{bmatrix} \begin{bmatrix} 1 & 0 & 0 & 0 \\ 0 & c_{4\theta_{TA}} & s_{4\theta_{TA}} & 0 \\ 0 & s_{4\theta_{TA}} & -c_{4\theta_{TA}} & 0 \\ 0 & 0 & 0 & -1 \end{bmatrix} \\
&\quad \cdot T_{O\_TA} \begin{bmatrix} 1 & 0 & 0 & 0 \\ 0 & 1 & 0 & 0 \\ 0 & 0 & 1 & 0 \\ 0 & 0 & 0 & 1 \end{bmatrix} \begin{bmatrix} 1 & 0 & 0 & 0 \\ 0 & c_{2\omega_{TA}} & s_{2\omega_{TA}} & 0 \\ 0 & -s_{2\omega_{TA}} & c_{2\omega_{TA}} & 0 \\ 0 & 0 & 0 & 1 \end{bmatrix} \\
&\quad \cdot F_{11} \begin{bmatrix} f_{11} + g_{11} & f_{12} & f_{13} & f_{14} \\ f_{12} & f_{22} + g_{22} & f_{23} & f_{24} \\ -f_{13} & -f_{23} & f_{33} + g_{33} & f_{34} \\ f_{14} & f_{24} & -f_{34} & f_{44} + g_{44} \end{bmatrix} \begin{bmatrix} 1 \\ c_{4\vartheta_{LA}} \\ s_{4\vartheta_{LA}} \\ 0 \end{bmatrix} \Rightarrow \\
\Rightarrow \frac{I_{LA\_TA\_S}}{E_{LA\_TA}\eta_{S\_TA}T_{S\_TA}T_{O\_TA}F_{11}} &= \left[ f_{11} + g_{11} + c_{4\vartheta_{LA}}f_{12} + s_{4\vartheta_{LA}}f_{13} + \right. \\
&\quad + D_{S\_TA}c_{(4\theta_{TA}+2\omega_{TA})}[f_{12} + c_{4\vartheta_{LA}}(f_{22} + g_{22}) + s_{4\vartheta_{LA}}f_{23}] + \\
&\quad \left. + D_{S\_TA}s_{(4\theta_{TA}+2\omega_{TA})}[-f_{13} - c_{4\vartheta_{LA}}f_{23} + s_{4\vartheta_{LA}}(f_{33} + g_{33})] \right] \quad (S20)
\end{aligned}$$

After correcting the effect due to the rotation of the detection unit after telescope A, by setting the fast-axis-angle of  $HWP_{TA}$  at  $\theta_{TA} = -\frac{\omega_{TA}}{2}$  (Section 4.1 in manuscript), Eq. S20 is written as Eq. S21.

$$\begin{aligned}
\frac{I_{LA\_TA\_S(\theta_{TA}=-\frac{\omega_{TA}}{2})}}{E_{LA\_TA}\eta_{S\_TA}T_{S\_TA}T_{O\_TA}F_{11}} &= f_{11} + g_{11} + c_{4\vartheta_{LA}}f_{12} + s_{4\vartheta_{LA}}f_{13} + \\
&\quad + D_{S\_TA}(f_{12} + c_{4\vartheta_{LA}}(f_{22} + g_{22}) + s_{4\vartheta_{LA}}f_{23}) \quad (S21)
\end{aligned}$$

## S2.3 $I_{LB\_TA\_S}$ : The signals from laser B, at the detection unit after telescope A

The measurements of the backscattered light of laser B at the detectors of telescope A are provided in Eq. S22. The  $HWP_{TA}$  (Fig. S1), with Mueller matrix  $\mathbf{M}_{HW\_TA}$  is used for the correction of the effect of the rotation of the detection unit after telescope A, on  $I_{LB\_TA\_S}$  (Section 4.1 in manuscript).

$$\begin{aligned}
\frac{I_{LB.TA.S}}{E_{LB.TA}\eta_{S.TA}} &= \tilde{\mathbf{e}}\mathbf{M}_{S.TA}\mathbf{M}_{HW.TA}\mathbf{M}_{O.TA}\mathbf{R}_{TA}[\mathbf{F}(\tilde{\mathbf{x}}) + \mathbf{G}]\tilde{\mathbf{i}}_{LB} = \\
&= \begin{bmatrix} 1 \\ 0 \\ 0 \\ 0 \end{bmatrix} T_{S.TA} \begin{bmatrix} 1 & D_{S.TA} & 0 & 0 \\ D_{S.TA} & 1 & 0 & 0 \\ 0 & 0 & 0 & 0 \\ 0 & 0 & 0 & 0 \end{bmatrix} \begin{bmatrix} 1 & 0 & 0 & 0 \\ 0 & c_{4\theta_{TA}} & s_{4\theta_{TA}} & 0 \\ 0 & s_{4\theta_{TA}} & -c_{4\theta_{TA}} & 0 \\ 0 & 0 & 0 & -1 \end{bmatrix} \\
&\quad \cdot T_{O.TA} \begin{bmatrix} 1 & 0 & 0 & 0 \\ 0 & 1 & 0 & 0 \\ 0 & 0 & 1 & 0 \\ 0 & 0 & 0 & 1 \end{bmatrix} \begin{bmatrix} 1 & 0 & 0 & 0 \\ 0 & c_{2\omega_{TA}} & s_{2\omega_{TA}} & 0 \\ 0 & -s_{2\omega_{TA}} & c_{2\omega_{TA}} & 0 \\ 0 & 0 & 0 & 1 \end{bmatrix} \\
&\quad \cdot F_{11} \begin{bmatrix} f_{11} + g_{11} & f_{12} & f_{13} & f_{14} \\ f_{12} & f_{22} + g_{22} & f_{23} & f_{24} \\ -f_{13} & -f_{23} & f_{33} + g_{33} & f_{34} \\ f_{14} & f_{24} & -f_{34} & f_{44} + g_{44} \end{bmatrix} \begin{bmatrix} 1 \\ c_{2\varphi_{LB}} c_{(4\theta_{LB}-2\phi_{LB})} \\ c_{2\varphi_{LB}} s_{(4\theta_{LB}-2\phi_{LB})} \\ -s_{2\varphi_{LB}} \end{bmatrix} \Rightarrow \\
\Rightarrow \frac{I_{LB.TA.S}}{E_{LB.TA}\eta_{S.TA}T_{S.TA}T_{O.TA}F_{11}} &= f_{11} + [D_{S.TA}c_{(4\theta_{TA}+2\omega_{TA})} + c_{2\varphi_{LB}}c_{(4\theta_{LB}-2\phi_{LB})}]f_{12} + \\
&\quad + [c_{2\varphi_{LB}}s_{(4\theta_{LB}-2\phi_{LB})} - D_{S.TA}s_{(4\theta_{TA}+2\omega_{TA})}]f_{13} \\
&\quad - s_{2\varphi_{LB}}f_{14} + D_{S.TA}c_{(4\theta_{TA}+2\omega_{TA})}c_{2\varphi_{LB}}c_{(4\theta_{LB}-2\phi_{LB})}f_{22} + \\
&\quad + D_{S.TA}c_{2\varphi_{LB}}[c_{(4\theta_{TA}+2\omega_{TA})}s_{(4\theta_{LB}-2\phi_{LB})} - s_{(4\theta_{TA}+2\omega_{TA})}c_{(4\theta_{LB}-2\phi_{LB})}]f_{23} + \\
&\quad - D_{S.TA}c_{(4\theta_{TA}+2\omega_{TA})}s_{2\varphi_{LB}}f_{24} + \\
&\quad + D_{S.TA}s_{(4\theta_{TA}+2\omega_{TA})}c_{2\varphi_{LB}}s_{(4\theta_{LB}-2\phi_{LB})}f_{33} + \\
&\quad - D_{S.TA}s_{(4\theta_{TA}+2\omega_{TA})}s_{2\varphi_{LB}}f_{34} + \\
&\quad + g_{11} + D_{S.TA}c_{(4\theta_{TA}+2\omega_{TA})}c_{2\varphi_{LB}}c_{(4\theta_{LB}-2\phi_{LB})}g_{22} + \\
&\quad + D_{S.TA}s_{(4\theta_{TA}+2\omega_{TA})}c_{2\varphi_{LB}}s_{(4\theta_{LB}-2\phi_{LB})}g_{33} \tag{S22}
\end{aligned}$$

After correcting for the rotation of the detection unit after telescope A, by setting the fast-axis-angle of  $HWP_{TA}$  at  $\theta_{TA} = -\frac{\omega_{TA}}{2}$  (Section 4.1 in manuscript), Eq. S22 is written as Eq. S23.

$$\begin{aligned}
\frac{I_{LB.TA.S(\theta_{TA}=-\frac{\omega_{TA}}{2})}}{E_{LB.TA}\eta_{S.TA}T_{S.TA}T_{O.TA}F_{11}} &= f_{11} + [D_{S.TA} + c_{2\varphi_{LB}}c_{(4\theta_{LB}-2\phi_{LB})}]f_{12} + c_{2\varphi_{LB}}s_{(4\theta_{LB}-2\phi_{LB})}f_{13} + \\
&\quad - s_{2\varphi_{LB}}f_{14} + D_{S.TA}c_{2\varphi_{LB}}c_{(4\theta_{LB}-2\phi_{LB})}f_{22} + D_{S.TA}c_{2\varphi_{LB}}s_{(4\theta_{LB}-2\phi_{LB})}f_{23} + \\
&\quad - D_{S.TA}s_{2\varphi_{LB}}f_{24} + g_{11} + D_{S.TA}c_{2\varphi_{LB}}c_{(4\theta_{LB}-2\phi_{LB})}g_{22} \tag{S23}
\end{aligned}$$

## S2.4 $\mathbf{I}_{LA.TB.S}$ : The signals from laser A, at the detection unit after telescope B

The measurements of the backscattered light of laser A at the detectors of telescope B are provided in Eq. S25. The rotation of the detection unit after telescope B by an angle  $\omega_{TB}$  (Fig.

S2) is taken into account using the rotation matrix  $\mathbf{R}_{TB}(-\omega_{TB})$ , but as shown in Eq. S25 it does not affect the measurements.

The  $HWP_{TB}$  (Fig. S1), with Mueller matrix  $\mathbf{M}_{HWP_{TB}}$  is used for checking that the  $QWP_{TB}$  is at  $45^\circ$  with respect of the  $x_{DU_{TB}}$ -axis (Fig. S2), as shown in Section S4. The Mueller matrix of the  $QWP_{TB}$  with  $\phi_{TB} = 45^\circ$  is provided in Eq. S24.

$$\mathbf{M}_{QWP_{TB}(\phi_{TB}=45^\circ)} = \begin{bmatrix} 1 & 0 & 0 & 0 \\ 0 & c_{90}^2 & s_{90}c_{90} & -s_{90} \\ 0 & s_{90}c_{90} & s_{90}^2 & c_{90} \\ 0 & s_{90} & -c_{90} & 0 \end{bmatrix} = \begin{bmatrix} 1 & 0 & 0 & 0 \\ 0 & 0 & 0 & -1 \\ 0 & 0 & 1 & 0 \\ 0 & 1 & 0 & 0 \end{bmatrix} \quad (\text{S24})$$

$$\begin{aligned} \frac{I_{LA.TB.S}}{E_{LA.TB}\eta_{S.TB}} &= \tilde{\mathbf{e}}\mathbf{M}_{S.TB}\mathbf{M}_{QWP_{TB}}\mathbf{M}_{HWP_{TB}}\mathbf{M}_{O.TB}\mathbf{R}_{TB}[\mathbf{F}(\tilde{\mathbf{x}}) + \mathbf{G}]\tilde{\mathbf{i}}_{LA} = \\ &= \begin{bmatrix} 1 \\ 0 \\ 0 \\ 0 \end{bmatrix} T_{S.TB} \begin{bmatrix} 1 & D_{S.TB} & 0 & 0 \\ D_{S.TB} & 1 & 0 & 0 \\ 0 & 0 & 0 & 0 \\ 0 & 0 & 0 & 0 \end{bmatrix} \begin{bmatrix} 1 & 0 & 0 & 0 \\ 0 & 0 & 0 & -1 \\ 0 & 0 & 1 & 0 \\ 0 & 1 & 0 & 0 \end{bmatrix} \begin{bmatrix} 1 & 0 & 0 & 0 \\ 0 & c_{4\theta_{TB}} & s_{4\theta_{TB}} & 0 \\ 0 & s_{4\theta_{TB}} & -c_{4\theta_{TB}} & 0 \\ 0 & 0 & 0 & -1 \end{bmatrix} \\ &\quad \cdot T_{O.TB} \begin{bmatrix} 1 & 0 & 0 & 0 \\ 0 & 1 & 0 & 0 \\ 0 & 0 & 1 & 0 \\ 0 & 0 & 0 & 1 \end{bmatrix} \begin{bmatrix} 1 & 0 & 0 & 0 \\ 0 & c_{2\omega_{TB}} & s_{2\omega_{TB}} & 0 \\ 0 & -s_{2\omega_{TB}} & c_{2\omega_{TB}} & 0 \\ 0 & 0 & 0 & 1 \end{bmatrix} \\ &\quad \cdot F_{11} \begin{bmatrix} f_{11} + g_{11} & f_{12} & f_{13} & f_{14} \\ f_{12} & f_{22} + g_{22} & f_{23} & f_{24} \\ -f_{13} & -f_{23} & f_{33} + g_{33} & f_{34} \\ f_{14} & f_{24} & -f_{34} & f_{44} + g_{44} \end{bmatrix} \begin{bmatrix} 1 \\ c_{4\vartheta_{LA}} \\ s_{4\vartheta_{LA}} \\ 0 \end{bmatrix} \Rightarrow \\ \Rightarrow \frac{I_{LA.TB.S}}{E_{LA.TB}\eta_{S.TB}T_{S.TB}T_{O.TB}F_{11}} &= f_{11} + c_{4\vartheta_{LA}}f_{12} + s_{4\vartheta_{LA}}f_{13} + D_{S.TB}f_{14} + D_{S.TB}c_{4\vartheta_{LA}}f_{24} + \\ &\quad - D_{S.TB}s_{4\vartheta_{LA}}f_{34} + g_{11} \end{aligned} \quad (\text{S25})$$

## S2.5 $I_{LB.TB.S}$ : The signals from laser B, at the detection unit after telescope B

The measurements of the backscattered light of laser B at the detection unit after telescope B are provided in Eq. S26.

$$\begin{aligned}
\frac{I_{LB.TB.S}}{E_{LB.TB}\eta_{S.TB}} &= \tilde{\mathbf{e}}\mathbf{M}_{S.TB}\mathbf{M}_{QW.TB}\mathbf{M}_{HW.TB}\mathbf{M}_{O.TB}\mathbf{R}_{TB}[\mathbf{F}(\tilde{\mathbf{x}}) + \mathbf{G}]\tilde{\mathbf{i}}_{LB} = \\
&= \begin{bmatrix} 1 \\ 0 \\ 0 \\ 0 \end{bmatrix} T_{S.TB} \begin{bmatrix} 1 & D_{S.TB} & 0 & 0 \\ D_{S.TB} & 1 & 0 & 0 \\ 0 & 0 & 0 & 0 \\ 0 & 0 & 0 & 0 \end{bmatrix} \begin{bmatrix} 1 & 0 & 0 & 0 \\ 0 & 0 & 0 & -1 \\ 0 & 0 & 1 & 0 \\ 0 & 1 & 0 & 0 \end{bmatrix} \begin{bmatrix} 1 & 0 & 0 & 0 \\ 0 & c_{4\theta_{TB}} & s_{4\theta_{TB}} & 0 \\ 0 & s_{4\theta_{TB}} & -c_{4\theta_{TB}} & 0 \\ 0 & 0 & 0 & -1 \end{bmatrix} \\
&\quad \cdot T_{O.TB} \begin{bmatrix} 1 & 0 & 0 & 0 \\ 0 & 1 & 0 & 0 \\ 0 & 0 & 1 & 0 \\ 0 & 0 & 0 & 1 \end{bmatrix} \begin{bmatrix} 1 & 0 & 0 & 0 \\ 0 & c_{2\omega_{TB}} & s_{2\omega_{TB}} & 0 \\ 0 & -s_{2\omega_{TB}} & c_{2\omega_{TB}} & 0 \\ 0 & 0 & 0 & 1 \end{bmatrix} \\
&\quad \cdot F_{11} \begin{bmatrix} f_{11} + g_{11} & f_{12} & f_{13} & f_{14} \\ f_{12} & f_{22} + g_{22} & f_{23} & f_{24} \\ -f_{13} & -f_{23} & f_{33} + g_{33} & f_{34} \\ f_{14} & f_{24} & -f_{34} & f_{44} + g_{44} \end{bmatrix} \begin{bmatrix} 1 \\ c_{2\varphi_{LB}} c_{(4\theta_{LB}-2\phi_{LB})} \\ c_{2\varphi_{LB}} s_{(4\theta_{LB}-2\phi_{LB})} \\ -s_{2\varphi_{LB}} \end{bmatrix} \Rightarrow \\
\Rightarrow \frac{I_{LB.TB.S}}{E_{LB.TB}\eta_{S.TB}T_{S.TB}T_{O.TB}F_{11}} &= f_{11} + c_{2\varphi_{LB}} c_{(4\theta_{LB}-2\phi_{LB})} f_{12} + c_{2\varphi_{LB}} s_{(4\theta_{LB}-2\phi_{LB})} f_{13} + \\
&\quad + (D_{S.TB} - s_{2\varphi_{LB}}) f_{14} + D_{S.TB} c_{2\varphi_{LB}} c_{(4\theta_{LB}-2\phi_{LB})} f_{24} + \\
&\quad - D_{S.TB} c_{2\varphi_{LB}} s_{(4\theta_{LB}-2\phi_{LB})} f_{34} - D_{S.TB} s_{2\varphi_{LB}} f_{44} + \\
&\quad + g_{11} - D_{S.TB} s_{2\varphi_{LB}} g_{44}
\end{aligned} \tag{S26}$$

### S3 Calculation of the measured intensities after we place a linear polarizer at $45^\circ$ in front of the emission unit of laser A

After placing a linear polarizer in front of the window in front of the emission unit of laser A, at  $45^\circ$  from  $x_F$ -axis (Fig. S3), the Stokes vector of the emitted light  $\tilde{\mathbf{i}}_{LA,45^\circ}$  is provided by Eq. S27. The measured intensities  $I_{LA,TA,S,45^\circ}$  at the detectors after telescope A are provided in Eq. S28.

In Eq. S27 we consider an ideal linear polarizer. The Mueller matrix of the ideal linear polarizer at  $45^\circ$  ( $\mathbf{LP}_{45^\circ}$ ) is taken from the Handbook of optics (Table 1 in section 14.11). In Eq. S28 we consider randomly-oriented particles.

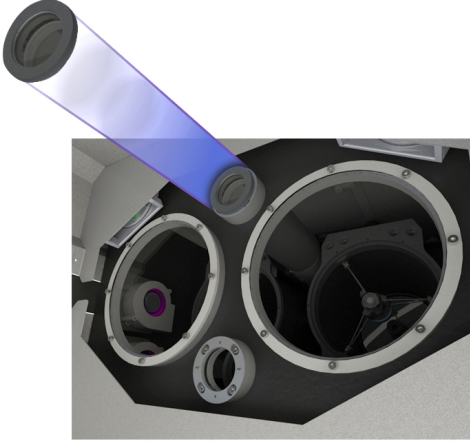

Figure S3: Linear polarizer in front of the window of laser A, placed at  $45^\circ$  from  $x_F$ -axis.

$$\tilde{\mathbf{i}}_{LA,45^\circ} = \mathbf{LP}_{45^\circ} \tilde{\mathbf{i}}_{LA} = \frac{1}{2} \begin{bmatrix} 1 & 0 & 1 & 0 \\ 0 & 0 & 0 & 0 \\ 1 & 0 & 1 & 0 \\ 0 & 0 & 0 & 0 \end{bmatrix} \begin{bmatrix} 1 \\ c_{4\vartheta_{LA}} \\ s_{4\vartheta_{LA}} \\ 0 \end{bmatrix} = \frac{1 + s_{4\vartheta_{LA}}}{2} \begin{bmatrix} 1 \\ 0 \\ 1 \\ 0 \end{bmatrix} \quad (\text{S27})$$

$$\begin{aligned}
\frac{I_{LA\_TA\_S\_45^\circ}}{E_{LA\_TA}\eta_{STA}} &= \mathbf{M}_{S\_TA}\mathbf{M}_{HW\_TA}\mathbf{M}_{O\_TA}\mathbf{R}_{TA}[\mathbf{F}(\vec{x}) + \mathbf{G}]\tilde{\mathbf{i}}_{LA\_45^\circ} = \\
&= T_{S\_TA} \begin{bmatrix} 1 & D_{S\_TA} & 0 & 0 \\ D_{S\_TA} & 1 & 0 & 0 \\ 0 & 0 & 0 & 0 \\ 0 & 0 & 0 & 0 \end{bmatrix} \begin{bmatrix} 1 & 0 & 0 & 0 \\ 0 & c_{4\theta_{TA}} & s_{4\theta_{TA}} & 0 \\ 0 & s_{4\theta_{TA}} & -c_{4\theta_{TA}} & 0 \\ 0 & 0 & 0 & -1 \end{bmatrix} \cdot \\
&\quad \cdot T_{O\_TA} \begin{bmatrix} 1 & 0 & 0 & 0 \\ 0 & 1 & 0 & 0 \\ 0 & 0 & 1 & 0 \\ 0 & 0 & 0 & 1 \end{bmatrix} \begin{bmatrix} 1 & 0 & 0 & 0 \\ 0 & c_{2\omega_{TA}} & s_{2\omega_{TA}} & 0 \\ 0 & -s_{2\omega_{TA}} & c_{2\omega_{TA}} & 0 \\ 0 & 0 & 0 & 1 \end{bmatrix} \cdot \\
&\quad \cdot F_{11} \begin{bmatrix} f_{11} + g_{11} & 0 & 0 & 0 \\ 0 & f_{22} + g_{22} & 0 & 0 \\ 0 & 0 & f_{33} + g_{33} & 0 \\ 0 & 0 & 0 & f_{44} + g_{44} \end{bmatrix} \frac{1 + s_{4\theta_{LA}}}{2} \begin{bmatrix} 1 \\ 0 \\ 1 \\ 0 \end{bmatrix} \Rightarrow \\
\Rightarrow \frac{I_{LA\_TA\_S\_45^\circ}}{E_{LA\_TA}\eta_{STA}T_{S\_TA}T_{O\_TA}F_{11}} &= \frac{1}{2} \left[ f_{11} + g_{11} + D_{S\_TA}s_{(4\theta_{TA}+2\omega_{TA})}(f_{33} + g_{33}) \right] (1 + s_{4\theta_{LA}}) \\
&\quad (S28)
\end{aligned}$$

## S4 Check that the fast-axis-angle of $QWP_{TB}$ is at $45^\circ$ with respect to $x_{DU_{TB}}$ -axis

In order to check for the accurate placement of the fast-axis-angle of  $QWP_{TB}$  at  $45^\circ$  with respect to the  $x_{DU_{TB}}$ -axis, we rotate the  $HWP_{TB}$  before  $QWP_{TB}$ , at various random positions. If  $I_{LA_{TB}_S}$  changes when  $HWP_{TB}$  is placed at the different positions, the  $QWP_{TB}$  is not placed at  $45^\circ$  with respect to the  $x_{DU_{TB}}$ -axis.

Considering a misalignment of  $QWP_{TB}$  by  $\varepsilon_{TB}$ , the fast-axis-angle of  $QWP_{TB}$  is  $\phi_{TB} = 45^\circ + \varepsilon_{TB}$  and the measurements at the detection unit after telescope B ( $I_{LA_{TB}_S}(\phi_{TB}=45^\circ+\varepsilon_{TB})$ ) change with the rotation of the  $HWP_{TB}$ , as shown in Eq. S30. If  $\varepsilon_{TB} = 0$ , then  $\phi_{TB} = 45^\circ$ , and the measurements  $I_{LA_{TB}_S}(\phi_{TB}=45^\circ)$ , do not change with the rotation of the  $HWP_{TB}$  (Eq. S31).

The same is true for  $I_{LB_{TB}_S}$  (not shown here).

$$\begin{aligned} \mathbf{M}_{QW_{TB}-(\phi_{TB}=45^\circ+\varepsilon_{TB})} &= \begin{bmatrix} 1 & 0 & 0 & 0 \\ 0 & c_{2(45+\varepsilon_{TB})}^2 & s_{2(45+\varepsilon_{TB})}c_{2(45+\varepsilon_{TB})} & -s_{2(45+\varepsilon_{TB})} \\ 0 & s_{2(45+\varepsilon_{TB})}c_{2(45+\varepsilon_{TB})} & s_{2(45+\varepsilon_{TB})}^2 & c_{2(45+\varepsilon_{TB})} \\ 0 & s_{2(45+\varepsilon_{TB})} & -c_{2(45+\varepsilon_{TB})} & 0 \end{bmatrix} = \\ &= \begin{bmatrix} 1 & 0 & 0 & 0 \\ 0 & s_{2\varepsilon_{TB}}^2 & -s_{2\varepsilon_{TB}}c_{2\varepsilon_{TB}} & -c_{2\varepsilon_{TB}} \\ 0 & -s_{2\varepsilon_{TB}}c_{2\varepsilon_{TB}} & c_{2\varepsilon_{TB}}^2 & -s_{2\varepsilon_{TB}} \\ 0 & c_{2\varepsilon_{TB}} & s_{2\varepsilon_{TB}} & 0 \end{bmatrix} \end{aligned} \quad (S29)$$

$$\begin{aligned} \frac{I_{LA_{TB}_S}(\phi_{TB}=45^\circ+\varepsilon_{TB})}{E_{LA_{TB}}\eta_{S_{TB}}} &= \tilde{\mathbf{e}}\mathbf{M}_{S_{TB}}\mathbf{M}_{QW_{TB}-(\phi_{TB}=45^\circ+\varepsilon_{TB})}\mathbf{M}_{HW_{TB}}\mathbf{M}_{O_{TB}}\mathbf{R}_{TB}[\mathbf{F}(\tilde{\mathbf{x}}) + \mathbf{G}]\tilde{\mathbf{i}}_{LA} = \\ &= \begin{bmatrix} 1 \\ 0 \\ 0 \\ 0 \end{bmatrix} T_{S_{TB}} \begin{bmatrix} 1 & D_{S_{TB}} & 0 & 0 \\ D_{S_{TB}} & 1 & 0 & 0 \\ 0 & 0 & 0 & 0 \\ 0 & 0 & 0 & 0 \end{bmatrix} \begin{bmatrix} 1 & 0 & 0 & 0 \\ 0 & s_{2\varepsilon_{TB}}^2 & -s_{2\varepsilon_{TB}}c_{2\varepsilon_{TB}} & -c_{2\varepsilon_{TB}} \\ 0 & -s_{2\varepsilon_{TB}}c_{2\varepsilon_{TB}} & c_{2\varepsilon_{TB}}^2 & -s_{2\varepsilon_{TB}} \\ 0 & c_{2\varepsilon_{TB}} & s_{2\varepsilon_{TB}} & 0 \end{bmatrix} \\ &\quad \cdot \begin{bmatrix} 1 & 0 & 0 & 0 \\ 0 & c_{4\theta_{TB}} & s_{4\theta_{TB}} & 0 \\ 0 & s_{4\theta_{TB}} & -c_{4\theta_{TB}} & 0 \\ 0 & 0 & 0 & -1 \end{bmatrix} T_{O_{TB}} \begin{bmatrix} 1 & 0 & 0 & 0 \\ 0 & 1 & 0 & 0 \\ 0 & 0 & 1 & 0 \\ 0 & 0 & 0 & 1 \end{bmatrix} \begin{bmatrix} 1 & 0 & 0 & 0 \\ 0 & c_{2\omega_{TB}} & s_{2\omega_{TB}} & 0 \\ 0 & -s_{2\omega_{TB}} & c_{2\omega_{TB}} & 0 \\ 0 & 0 & 0 & 1 \end{bmatrix} \\ &\quad \cdot F_{11} \begin{bmatrix} f_{11} + g_{11} & f_{12} & f_{13} & f_{14} \\ f_{12} & f_{22} + g_{22} & f_{23} & f_{24} \\ -f_{13} & -f_{23} & f_{33} + g_{33} & f_{34} \\ f_{14} & f_{24} & -f_{34} & f_{44} + g_{44} \end{bmatrix} \begin{bmatrix} 1 \\ 0 \\ 1 \\ 0 \end{bmatrix} \Rightarrow \end{aligned}$$

$$\begin{aligned}
\Rightarrow \frac{I_{LA.TB.S-(\phi_{TB}=45^\circ+\varepsilon_{TB})}}{E_{LA.TB}\eta_{S.TB}T_{S.TB}T_{O.TB}F_{11}} &= f_{11} + g_{11} + f_{13} + D_{S.TB}c_{2\varepsilon_{TB}}f_{14} - D_{S.TB}c_{2\varepsilon_{TB}}f_{34} + \\
&+ D_{S.TB}s_{2\varepsilon_{TB}}^2[c_{(4\theta_{TB}+2\omega_{TB})}(f_{12} + f_{23}) + \\
&\quad + s_{(4\theta_{TB}+2\omega_{TB})}(-f_{13} + f_{33} + g_{33})] + \\
&- D_{S.TB}c_{2\varepsilon_{TB}}s_{2\varepsilon_{TB}}[s_{(4\theta_{TB}+2\omega_{TB})}(f_{12} + f_{23}) + \\
&\quad - c_{(4\theta_{TB}+2\omega_{TB})}(-f_{13} + f_{33} + g_{33})] \tag{S30}
\end{aligned}$$

$$\frac{I_{LA.TB.S-(\phi_{TB}=45^\circ)}}{E_{LA.TB}\eta_{S.TB}T_{S.TB}T_{O.TB}F_{11}} = f_{11} + f_{13} + D_{S.TB}f_{14} - D_{S.TB}f_{34} + g_{11} \tag{S31}$$

## S5 References

Freudenthaler, V.: About the effects of polarising optics on lidar signals and the  $\Delta 90$ -calibration, Atmos. Meas. Tech., 9, 4181-4255, 2016a, doi: 10.5194/amt-9-4181-2016  
Handbook of Optics, Volume I - Geometrical and Physical Optics, Polarized Light, Components and Instruments (3rd Edition), Bass, M. (Ed.). McGraw Hill Professional, 2009.

## S6 Acronyms and symbols

In the following table a list of acronyms and symbols is provided. In the third column we provide the equation where we first find them.

|                                                   |                                                                                                                                                                                                                             |         |
|---------------------------------------------------|-----------------------------------------------------------------------------------------------------------------------------------------------------------------------------------------------------------------------------|---------|
| $a$                                               | The polarization parameter of the atmosphere                                                                                                                                                                                |         |
| $\alpha$                                          | The angle of the polarization ellipse                                                                                                                                                                                       |         |
| $A_k$                                             | Area of telescope $k$                                                                                                                                                                                                       | Eq. S12 |
| $b$                                               | The degree of linear polarization                                                                                                                                                                                           |         |
| $c_x$                                             | Cosine of $x$                                                                                                                                                                                                               | Eq. S4  |
| $\delta$                                          | Volume linear depolarization ratio                                                                                                                                                                                          |         |
| $\Delta_R$                                        | The retardance of $\mathbf{M}_R$                                                                                                                                                                                            | Eq. S10 |
| $\Delta_T$                                        | The retardance of $\mathbf{M}_T$                                                                                                                                                                                            | Eq. S8  |
| $\Delta_{TO}$                                     | The retardance of $\mathbf{M}_O$                                                                                                                                                                                            | Eq. S4  |
| $D_O$                                             | The diattenuation parameter of $\mathbf{M}_O$                                                                                                                                                                               | Eq. S4  |
| $D_R$                                             | The diattenuation parameter of $\mathbf{M}_R$                                                                                                                                                                               | Eq. S10 |
| $D_T$                                             | The diattenuation parameter of $\mathbf{M}_T$                                                                                                                                                                               | Eq. S8  |
| $\tilde{\mathbf{e}}$                              | $[1, 0, 0, 0]^T$                                                                                                                                                                                                            | Eq. S12 |
| $E_{o.i}$                                         | The pulse energy of the laser $i$                                                                                                                                                                                           | Eq. S12 |
| $\mathbf{F}$                                      | The backscatter Stokes phase matrix of the dust particles in the atmosphere                                                                                                                                                 | Eq. S1  |
| $\mathbf{F}_{\text{atm}}$                         | The backscatter Stokes phase matrix of an atmosphere with randomly-oriented particles and gases                                                                                                                             | Eq. S3  |
| $\mathbf{G}$                                      | The backscatter Stokes phase matrix of the the gases in the atmosphere                                                                                                                                                      | Eq. S2  |
| $HWP$                                             | Half Wave Plate                                                                                                                                                                                                             | Eq. S6  |
| $i$                                               | Laser $i = LA, LB$                                                                                                                                                                                                          | Eq. S12 |
| $\tilde{\mathbf{i}}_i$                            | The Stokes vector of light from the emission unit of laser $i$                                                                                                                                                              | Eq. S12 |
| $\tilde{\mathbf{i}}_{LA\_45^\circ}$               | The Stokes vector of light from the emission unit of laser A, after placing a $LP$ in front of the window in front of the emission unit, at $45^\circ$ from $x_F$ -axis                                                     | Eq. S27 |
| $I_{i.k.S}$                                       | The intensities from laser $i$ at the detector $S = T$ or $R$ after telescope $k$                                                                                                                                           | Eq. S12 |
| $I_{i.TA.S(\theta_{TA}=-\frac{\omega_{TA}}{2})}$  | The intensities from laser $i$ at the detector $S = T$ or $R$ after telescope A, after correcting for the effect of the rotation of the detection unit, by setting the $HWP_{TA}$ at $\theta_{TA} = -\frac{\omega_{TA}}{2}$ | Eq. S23 |
| $I_{LA.k.S45^\circ}$                              | The intensities from laser A at the detector $S = T$ or $R$ after telescope $k$ , after placing a $LP$ in front of the window in front of the emission unit of laser A, at $45^\circ$ from $x_F$ -axis                      | Eq. S28 |
| $I_{i.TB.S(\phi_{TB}=45^\circ+\varepsilon_{TB})}$ | The intensities $I_{i.TB.S}$ , in case the fast-axis-angle of $QWP_{TB}$ is misaligned by $\varepsilon_{TB}$ ( $\phi_{TB} = 45^\circ + \varepsilon_{TB}$ )                                                                  | Eq. S30 |

|                                          |                                                                                                                                                                                                                             |         |
|------------------------------------------|-----------------------------------------------------------------------------------------------------------------------------------------------------------------------------------------------------------------------------|---------|
| $k$                                      | Telescope $k = TA, TB$                                                                                                                                                                                                      | Eq. S12 |
| $\eta_k$                                 | The calibration factor of the ratio of the intensities at the detectors $R$ and $T$ after telescope $k$                                                                                                                     |         |
| $\theta$                                 | The fast-axis-angle of the $HWP$                                                                                                                                                                                            | Eq. S6  |
| $\vartheta_{LA}$                         | $\vartheta_{LA} = \theta_{LA} - \frac{\alpha_{LA}}{2}$ , where $\theta_{LA}$ is the fast-axis-angle of the $HWP_{LA}$ and $\alpha_{LA}$ is the angle of the polarization ellipse of the light emitted directly from laser A | Eq. S14 |
| $\mathbf{M}_{HW}$                        | Mueller matrix of the $HWP$                                                                                                                                                                                                 | Eq. S6  |
| $\mathbf{M}_O$                           | Mueller matrix of the receiver optics (i.e. telescope $k$ , collimating lenses, bandpass filter)                                                                                                                            | Eq. S4  |
| $\mathbf{M}_T$                           | Mueller matrix of the transmitting part of the $PBS$ , followed by cleaning polarizers                                                                                                                                      | Eq. S9  |
| $\mathbf{M}_R$                           | Mueller matrix of the reflecting part of the $PBS$ , followed by cleaning polarizers                                                                                                                                        | Eq. S11 |
| $\mathbf{M}_{QW}$                        | Mueller matrix of the $QWP$                                                                                                                                                                                                 | Eq. S7  |
| $\mathbf{M}_{QW-TB(\phi_{TB}=45^\circ)}$ | Mueller matrix of the $QWP_{TB}$ with its fast-axis-angle at $\phi_{TB} = 45^\circ$                                                                                                                                         | Eq. S24 |
| $O_{i,k}$                                | The laser beam receiver field-of-view overlap function, for laser $i$ and telescope $k$                                                                                                                                     | Eq. S12 |
| $PBS$                                    | Polarizing Beam Splitter                                                                                                                                                                                                    |         |
| $QWP$                                    | Quarter Wave Plate                                                                                                                                                                                                          |         |
| $\mathbf{R}_k$                           | The rotation matrix used to describe the rotation of the detection unit after telescope $k$ , with respect to the frame coordinate system                                                                                   | Eq. S20 |
| $S$                                      | “Transmitted” and “Reflected” channels after the $PBS$ , $S = T, R$ , respectively                                                                                                                                          | Eq. ??  |
| $s_x$                                    | Sine of $x$                                                                                                                                                                                                                 | Eq. S4  |
| $T(0, r)$                                | The transmission of the atmosphere between the lidar at range $r = 0$ and a specific range $r$ in the atmosphere                                                                                                            | Eq. S12 |
| $T_O$                                    | The transmission of $\mathbf{M}_O$                                                                                                                                                                                          | Eq. S4  |
| $T_R$                                    | The transmission of $\mathbf{M}_R$                                                                                                                                                                                          | Eq. S10 |
| $T_T$                                    | The transmission of $\mathbf{M}_T$                                                                                                                                                                                          | Eq. S8  |
| VLDR                                     | Volume Linear Depolarization Ratio                                                                                                                                                                                          |         |
| $Z_O$                                    | The retardation parameter of $\mathbf{M}_O$                                                                                                                                                                                 | Eq. S4  |
| $Z_R$                                    | The retardation parameter of $\mathbf{M}_R$                                                                                                                                                                                 | Eq. S10 |
| $Z_T$                                    | The retardation parameter of $\mathbf{M}_T$                                                                                                                                                                                 | Eq. S8  |
| $\phi$                                   | The fast-axis-angle of $QWP$                                                                                                                                                                                                | Eq. S7  |
| $\varphi_{LB}$                           | $\varphi_{LB} = \phi_{LB} - \alpha_{LB}$ , where $\phi_{LB}$ is the fast-axis-angle of the $QWP_{LB}$ and $\alpha_{LB}$ is the angle of the polarization ellipse of the light emitted directly from laser B                 | Eq. S15 |
| $\omega_k$                               | The rotation angle of the detection unit after telescope $k$ , with respect to the frame coordinate system                                                                                                                  | Eq. S20 |
